# Supplementary material for: Pannexin1 Is Associated with Enhanced Epithelial-To-Mesenchymal Transition in Human Patient Breast Cancer Tissues and in Breast Cancer Cell Lines
Source: Cancers (Basel). 2019 Dec 7;11(12):1967. doi: 10.3390/cancers11121967 (PMC6966616; doi:10.3390/cancers11121967)
Supplement: Supplementary file 1 [file cancers-11-01967-s001.pdf]

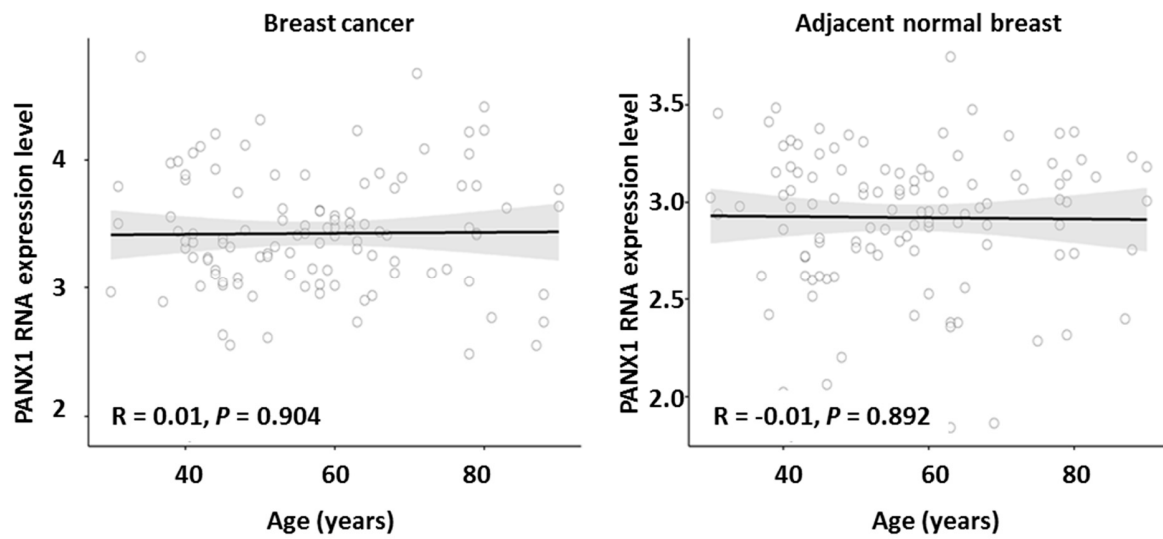

Figure S1: **PANX1 expression does not correlate with age.** Scatter plots representing the analysis of PANX1 mRNA expression correlation with age in breast cancer tissues ( $P = 0.904$ ) and in adjacent non-cancerous breast tissues ( $P = 0.892$ ).

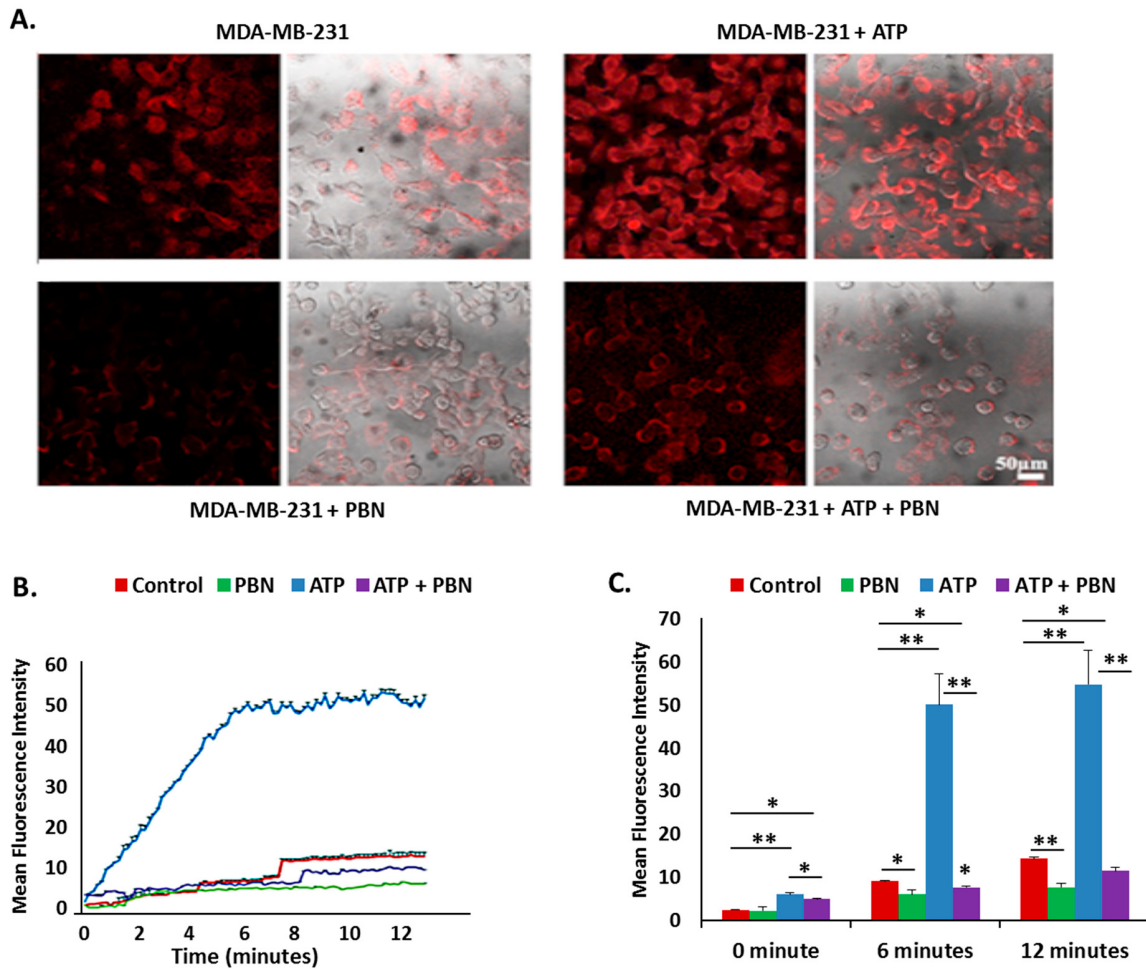

**Figure S2: PBN attenuates ATP-induced EtBr dye uptake by PANX1 channels.** (A) Representative fluorescence micrographs of EtBr uptake. EtBr dye uptake was induced in untreated MDA-MB-231 cells and in MDA-MB-231 cells pre-treated with 1 mM PBN, by the addition of 1 mM ATP in normal divalent physiological solution (2 mM  $\text{Ca}^{2+}$  and 1 mM  $\text{Mg}^{2+}$ ) and at room temperature. (B) Kinetic traces of the conditions specified in (A); Dye uptake was recorded by live imaging and images were acquired at 10-second intervals. The mean fluorescence intensity (MFI) of 5 different fields in each micrograph was used to quantify overall fluorescence. Data are displayed as EtBr MFI. (C) Summary of dye uptake assays in (B); Bar charts represent MFI calculated at 0, 6 and 12-minute timepoints for the different conditions. Results are representative of 2 independent experiments. \* $P < 0.05$ , \*\* $P < 0.01$ , and \*\*\* $P < 0.001$ .

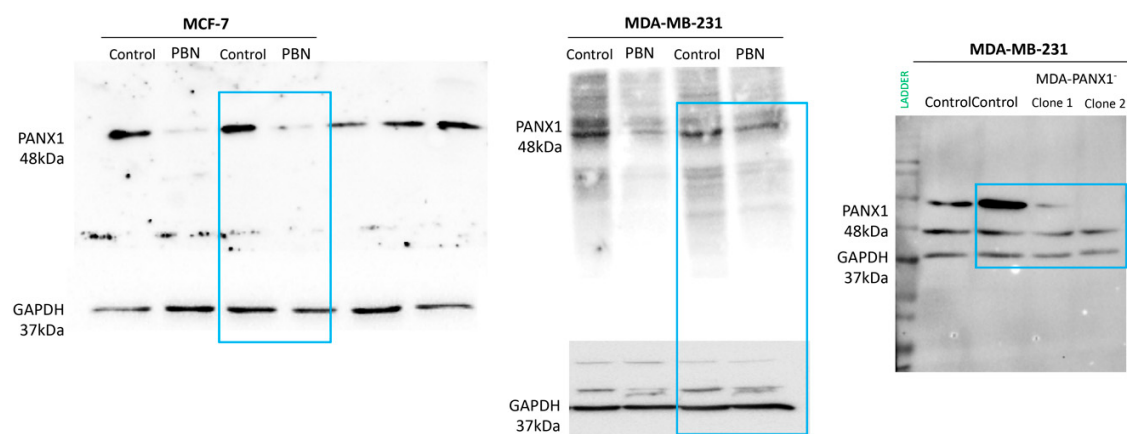

**Figure S3:** Original western blot images captured using the BioRad Chemidoc MP system.

**Table S1:** Intensity ratios of the densitometry analysis of PANX1 and GAPDH western blot bands

|                                                                                           |         | Run 1 | Run 2 | Run 3 | Average | Standard Deviation | <i>p</i> value |
|-------------------------------------------------------------------------------------------|---------|-------|-------|-------|---------|--------------------|----------------|
| MCF-7                                                                                     | Control | 0.778 | 0.607 | 0.626 | 0.670   | 0.093              |                |
|                                                                                           | PBN     | 0.137 | 0.133 | 0.133 | 0.134   | 0.002              | $p < 0.005$    |
| MDA-MB-231                                                                                | Control | 0.859 | 1.044 | 0.631 | 0.845   | 0.207              |                |
|                                                                                           | PBN     | 0.520 | 0.384 | 0.510 | 0.471   | 0.075              | $p < 0.05$     |
|                                                                                           | Control | 1.427 | 1.213 | 1.450 | 1.363   | 0.131              |                |
| MDA-PANX1-                                                                                | Clone 1 | 0.670 | 0.404 | 0.382 | 0.485   | 0.160              | $p < 0.005$    |
|                                                                                           | Clone 2 | 0.838 | 0.609 | 0.755 | 0.734   | 0.116              | $p < 0.005$    |
| PBN: Probenecid<br><i>P</i> values were calculated according to Student's <i>t</i> -test. |         |       |       |       |         |                    |                |
